# Supplementary material
Source: publisher site journal article supplement (https://www.spandidos-publications.com/3576/downloadSupplementary)
Supplement: Supplementary file 1 [file downloadSupplementary]

## Sheet: Sheet1
Table SI. Evans blue staining results.
Group	Evans blue values, ng/mg
	No.1	No.2	No.3	No.4	No.5	No.6
Naive	0.09	0.092	0.087	0.092	0.088	0.089
Sham 7 days	0.081	0.079	0.083	0.08	0.082	0.081
SMIR 1 day	0.592	0.601	0.591	0.626	0.643	0.614
SMIR 3 days	0.695	0.701	0.714	0.733	0.681	0.714
SMIR 7 days	0.501	0.473	0.536	0.512	0.508	0.494
SMIR 14 days	0.323	0.315	0.33	0.292	0.312	0.307
SMIR 28 days	0.331	0.317	0.322	0.296	0.303	0.312
SMIR, skin/muscle incision and retraction.
